# Supplementary material
Source: Springer Nature journal article supplement (https://www.springermedizin.de/resource/supplementary/12890_2008_102_MOESM1_ESM.pdf/9505988)
Supplement: MOESM1 [file 9505988]

**Disease related:**

What is pneumonia?

What causes pneumonia?

Is pleurisy the same as pneumonia?

**Symptom related:**

What causes the pain?

Why was I so breathless?

Why am I still so tired?

**Implications for the Future and Managing Recovery:**

How long will it take for tiredness to go away?

What can I do to build up my strength and reduce my tiredness?

What am I allowed to do/ what should I avoid doing?

How much should I rest?

When should I go back to my GP, should I go back if I still have the cough?

What do I do now, do I need to go back for a check up, do I see my GP?

They told me I need an X-ray – will they send out the appointment?

If I have had it once – does that mean I will likely get it again , be more susceptible to it?

How do I avoid it in the future?

Is there a risk that I might spread this to other people in the household?

Is pneumonia the start of a longer term disease process?
